# Supplementary material for: Sulfur-doped g-C3N4/V2C MXene Schottky junctions for superior photocatalytic H2 evolution
Source: Royal Society of Chemistry journal article supplement (doi:10.1039/d4ta05929h), 2024-01-01
Supplement: d4ta05929h1.pdf [file d4ta05929h1.pdf]

## Supporting Information

### Sulfur-doped g-C<sub>3</sub>N<sub>4</sub>/V<sub>2</sub>C MXene Schottky junctions for superior photocatalytic H<sub>2</sub> evolution

Haitao Wang<sup>a</sup>, Jipeng Fan<sup>a</sup>, Jing Zou<sup>a</sup>, Yujie Zheng<sup>b</sup>, Dingsheng Wang<sup>c</sup>, Jizhou Jiang<sup>a,\*</sup>

*<sup>a</sup>School of Chemistry and Environmental Engineering, School of Environmental Ecology and Biological Engineering, Key Laboratory of Green Chemical Engineering Process of Ministry of Education, Engineering Research Center of Phosphorus Resources Development and Utilization of Ministry of Education, Novel Catalytic Materials of Hubei Engineering Research Center, Wuhan Institute of Technology, Wuhan 430205, P. R. China.*

*<sup>b</sup>MOE Key Laboratory of Low-grade Energy Utilization Technologies and Systems, CQU-NUS Renewable Energy Materials & Devices Joint Laboratory, School of Energy & Power Engineering, Chongqing University, Chongqing 400044, P. R. China.*

*<sup>c</sup>Department of Chemistry, Tsinghua University, Beijing 100084, P. R. China.*

**Corresponding Email:** [027wit@163.com](mailto:027wit@163.com)

## 18 **Experimental section**

### 19 **Chemicals and materials**

20  $V_2AlC$  (98%) Lithium fluoride (LiF, 98%) was bought from Shanghai Macklin Reagent. Hydrofluoric  
21 acid (HF,  $\geq 40\%$ ), triethanolamine (TEOA), melamine ( $\geq 99.5\%$ ), and sodium sulfate anhydrous ( $Na_2SO_4$ ,  
22 99%) were purchased from Aladdin Chemicals Reagent Technology Co., Ltd. Hydrochloric acid (HCl) was  
23 provided by Sinopharm. All the chemicals were analytical reagents and used directly without further  
24 purification.

### 25 **Synthesis of $V_2C$**

26 The  $V_2AlC$  MAX phase precursor etching was used to obtain multilayer  $V_2C$ . 0.5 g of  $V_2AlC$  was added  
27 to a teflon-lined reactor equipped with 1 g of LiF and 20 ml (9 mol) HCl etch agent and etched at 90 °C for  
28 72 h. The obtained suspension was centrifuged at 3500 rpm for 10 minutes, washed thoroughly with deionized  
29 water until the pH value reached 7, and then dried at 60 °C in a vacuum oven. Multilayer  $V_2C$  precipitates  
30 were obtained.

### 31 **Preparation of SCN**

32 Melamine (10 g) was placed in a porcelain boat and calcined at 520 °C in the air at a heating rate of 10  
33 °C  $min^{-1}$  for 4 h to obtain light yellow CN. 0.35 g CN and 2.45 g sulfur powder were added to the ball mill  
34 tank, and then the ball mill tank was pumped to vacuum by a circulating water vacuum pump. After grinding  
35 for 10 min, the samples were collected, and the mixture of sulfur powder and CN were transferred to the  
36 porcelain boat. SCN was obtained by calcining the mixture at 530 °C for 3 h in a tube furnace (5 °C  $min^{-1}$ ) in  
37 an  $N_2$  atmosphere.

### 38 **Fabrication of SCN/ $V_2C$ heterojunction**

39 2.45 g sulfur powder, 0.35 g CN, and 5 mg  $V_2C$  were added to the ball mill tank, and then the ball mill  
40 tank was pumped to vacuum by circulating water vacuum pump. The samples were collected after grinding

41 for 10 min, and the mixture of sulfur, CN, and V<sub>2</sub>C was transferred to the porcelain boat. SCN/V<sub>2</sub>C composites  
42 were obtained by calcining the mixture at 5 °C min<sup>-1</sup> at 530 °C for 3 h in a tube furnace in N<sub>2</sub> atmosphere.

### 43 **Physical characterizations**

44 A field emission scanning electron microscopy (FESEM, Gemini SEM 300, Germany Zeiss) with an  
45 energy-dispersive X-ray spectroscope (EDX) was employed to examine the surface morphology and element  
46 composition of as-obtained catalysts. The microstructure of all samples was examined by transmission  
47 electron microscopy (TEM) using a Tecnai G2 20 microscope operating at an acceleration voltage of 200 kV.  
48 A powder X-ray diffractometer (XRD, Bruker D8 ADVANCE diffractometer) was used to record the  
49 crystallographic structures of all samples. An X-ray photoelectron spectroscopy (XPS, ESCALAB XI<sup>+</sup> -600W,  
50 Thermo Fisher Scientific) was adopted to analyze the electronic structures and surface chemical components  
51 of as-obtained photocatalysts. The surface area (BET) and pore size distributions (PSD) were recorded by N<sub>2</sub>  
52 adsorption-desorption isotherm on a surface analyzer (ASAP 2020 HD88, Micromeritics USA). The pore size  
53 distributions were calculated according to the Barrett-Joyner-Halenda (BJH) method from the branch of  
54 adsorption isotherm.

55

## 56 Photoelectrochemical measurements

57 UV-Vis diffuse reflectance spectra were measured by a Carry5000 UV-vis spectrophotometer (Agilent).  
58 FT-IR spectra were obtained on a Thermo Nicolet Avatar 6700 FTIR spectrophotometer (Thermo Fisher  
59 Scientific). A contact angle measuring device (OCA 20, Dataphysics, Germany) was employed to study the  
60 wetting properties of the membranes. Transient fluorescence decay (TFD) Spectra and photoluminescence  
61 (PL) emission spectra of as-obtained photocatalysts were performed by an Edinburgh-FLS980 (England)  
62 spectrophotometer.

63 The wettability of the liquid medium on the surface of the sample was tested by a contact angle measuring  
64 device (OCA 20, Dataphysics, Germany). A total of 50 mg of the photocatalytic sample was pressed to 10  
65 MPa using a tablet press (YP-12). The prepared flakes were attached to the glass slides and loaded on the  
66 lifting platform of the contact angle tester, and the deionized water was used as the liquid medium for testing.

67 Transient photocurrent (TPC) responses and electrochemical impedance spectroscopy (EIS)  
68 measurements were evaluated on an electrochemical workstation (CHI660e Instruments) with a standard  
69 three-electrode photoelectrochemical cell, where an Ag/AgCl electrode, a platinum-wire electrode and a  
70 photocatalyst-coated glassy carbon electrode (GCE, 3 mm in diameter) were employed as the reference,  
71 counter, and working electrodes, respectively. Moreover, the recorded potential was converted to a reversible  
72 hydrogen electrode (RHE) by the following equation:  $E_{\text{RHE}} = E_{\text{Ag/AgCl}} + 0.1987 + 0.05916 \cdot \text{pH}$ . For working  
73 electrode preparation, 10 mg of as-prepared photocatalysts were mixed with 5 mL of deionized water, and  
74 then 5  $\mu\text{L}$  of the homogeneous suspension was pipetted onto a photocatalyst-coated GCE (3 mm in diameter).  
75 The electrolytes required for TPC responses and EIS tests were 0.5 M  $\text{Na}_2\text{SO}_4$  (pH = 6.7) and 5  $\text{mmol L}^{-1}$   
76 potassium ferricyanide solution, respectively. In addition, a 10 W xenon lamp (410~420 nm) was employed  
77 as the light source during the TPC response measurement.

78

## 79 Photocatalytic hydrogen evolution tests

80 The photocatalytic hydrogen evolution measurements were carried out in a full glass automatic online  
81 four-trace gas analysis system (Labsolar-6A, Beijing PerfectLight, China). A Xe lamp with an output power  
82 of 300 W (with a  $\lambda \geq 420$  nm cutoff filter as simulated visible light) acted as the light source.

83 In a typical process, 10 mL of triethanolamine (TEOA, sacrificial electron donors) and 20 mg of  
84 photocatalysts were added into 90 mL of deionized water. Then, 3 wt% of platinum provided by  $\text{H}_2\text{PtCl}_6 \cdot 6\text{H}_2\text{O}$   
85 was added to the mixed solution as a co-catalyst. Necessarily, the above photocatalyst solution was sonicated  
86 for at least 30 min before light exposure. Moreover, the photoreactor was also evacuated for 10 min until air  
87 was completely removed before testing.

88 During photocatalytic tests, the suspension was stirred continually, and the gas concentration balance  
89 was flowed by a fan. Additionally, the circulating cooling water (10 °C) system was kept open throughout the  
90 whole photocatalytic HER process to eliminate the thermal effect of photocatalysts. The generated  $\text{H}_2$  by  
91 photocatalytic HER was detected by an online gas chromatograph accompanied by a thermal conductivity  
92 detector (GC9790II, China) with Argon as carrier gas. The amount of generated  $\text{H}_2$  was estimated from the  
93 corresponding calibration plot. The apparent quantum efficiency (AQE) was measured according to the  
94 following equations.

$$\begin{aligned} \text{AQE}(\%) &= \frac{\text{number of reacted electrons}}{\text{number of incident photons}} \times 100\% \\ &= \frac{2 \times \text{number of evolved } \text{H}_2 \text{ molecules}}{\text{number of incident photons}} \times 100\% \end{aligned}$$

95

96

## 97 **Details of theoretical calculations**

98 The first principles density functional theory (DFT) calculation module CASTEP in Materials Studio  
99 software were used for geometry optimization and charge density difference calculation. The Broyden-  
100 Fletcher-Goldfarb-Shanno (BFGS) algorithm and the generalized gradient approximation (GGA) of the PBE  
101 scheme were employed to calculate the developed catalysts. The cut-off energy was 520 eV. The Brillouin  
102 zone was sampled with a  $2 \times 2 \times 1$  k-point grid based on the Monk horstPack method and the semiempirical  
103 dispersion correction of the Grimme scheme was considered for geometric optimization of all photocatalysts.  
104 The total energy of the convergence criterion for geometric optimization was  $1.0 \times 10^{-5}$  eV·atom<sup>-1</sup>. The  
105 maximum force was  $0.03$  eV·Å<sup>-1</sup> ( $1 \text{ \AA} = 0.1 \text{ nm}$ ), the maximum stress and maximum displacement were  $0.05$   
106 GPa and  $1.0 \times 10^{-3}$  Å, respectively.

107 The work functions of as-obtained catalysts were also calculated, which were dependent on the position  
108 of the Fermi level. The orbitals of developed photocatalysts were calculated through the DMol3 module of  
109 Materials Studio software. In generalized gradient approximation, the exchange-correlation function in the  
110 form of Perdew-Burke-Ernzerhof was used to calculate the catalyst surfaces. The cut-off energy was 400 eV.  
111 The Brillouin zone was sampled with a  $3 \times 3 \times 1$  k-point grid based on the Monk horstPack method and the  
112 semiempirical dispersion correction of the Grimme scheme was considered for geometric optimization of all  
113 samples. The total energy of the convergence criterion for geometric optimization was  $1.0 \times 10^{-5}$  Ha. The  
114 maximum force was  $0.002$  Ha·Å<sup>-1</sup> ( $1 \text{ \AA} = 0.1 \text{ nm}$ ), the maximum displacement was  $5.0 \times 10^{-3}$  Å.

115 The free energy calculation of hydrogen adsorption ( $\Delta G_{H^*}$ ) was based on Nørskov et al.'s calculation  
116 hydrogen electrode (CHE) model, which was defined as follows:

$$117 \quad \Delta G_{H^*} = \Delta E_{H^*} + \Delta ZPE - T\Delta S$$

118 Where  $\Delta E$ ,  $\Delta ZPE$ , and  $\Delta S$  respectively represented the changes in electronic energy, zero-point energy, and  
119 entropy that were caused by the adsorption of hydrogen. The ideal hydrogen adsorption free energy value  
120 ( $\Delta G_{H^*}$ ) was near zero, which could balance the adsorption and desorption of hydrogen reactions.

121

122

123

124

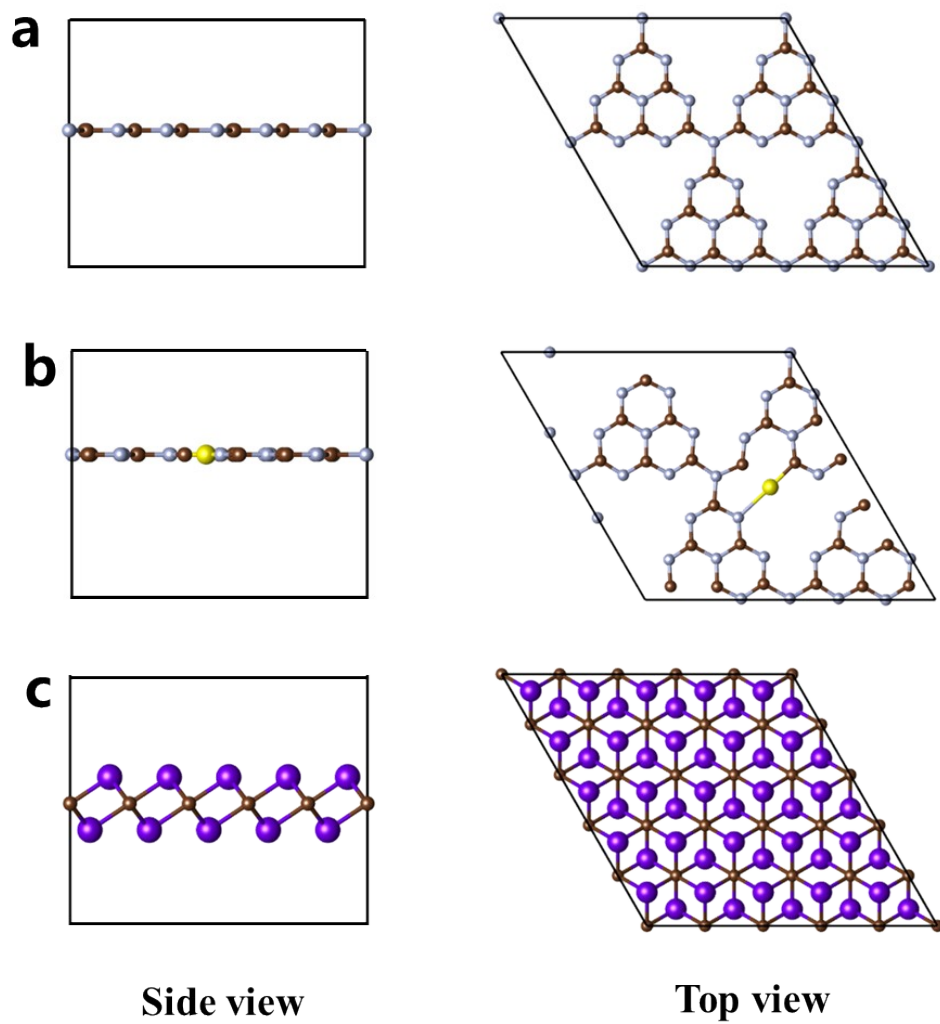

125

126

127

**Figure S1.** Theoretical structural model of (a) CN, (b) SCN, and (a)  $V_2C$ .



128

129

130

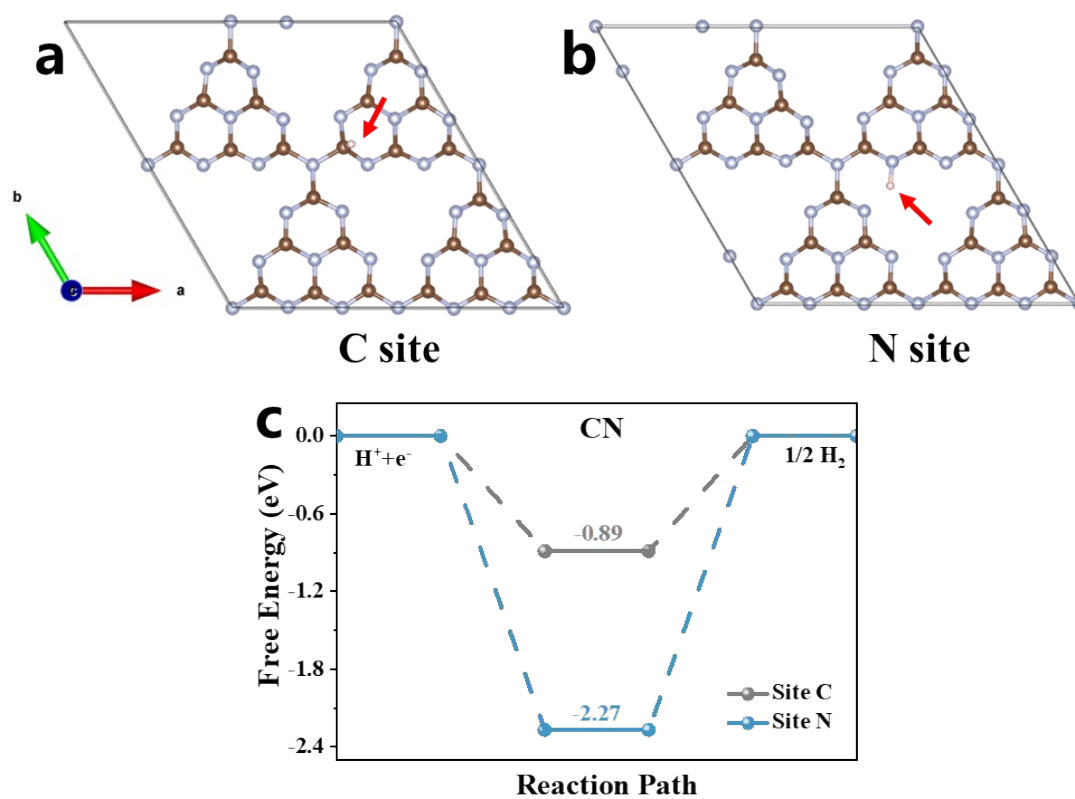

131

132 **Figure S2** (a-b) Optimized structures and (c) Gibbs free energy changes of H\* intermediates in C and N sites  
133 for CN.

134

135

136

137

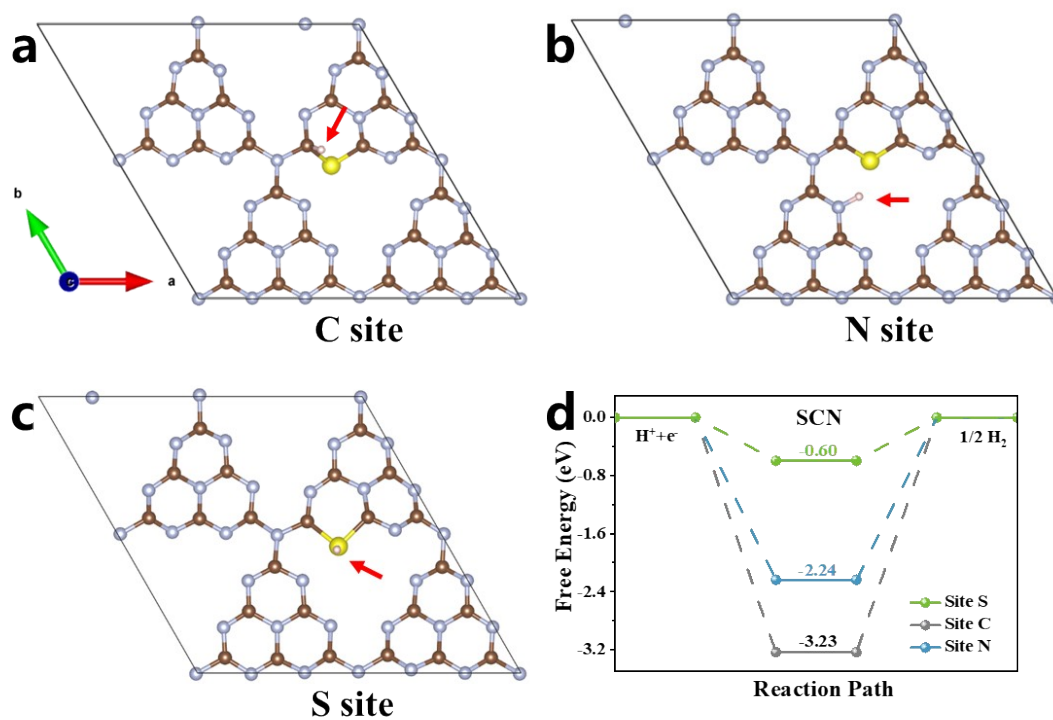

138

139 **Figure S3.** (a-c) Optimized structures and (d) Gibbs free energy changes of H\* intermediates in C, N, and S  
140 sites for SCN.

141

142

143

144

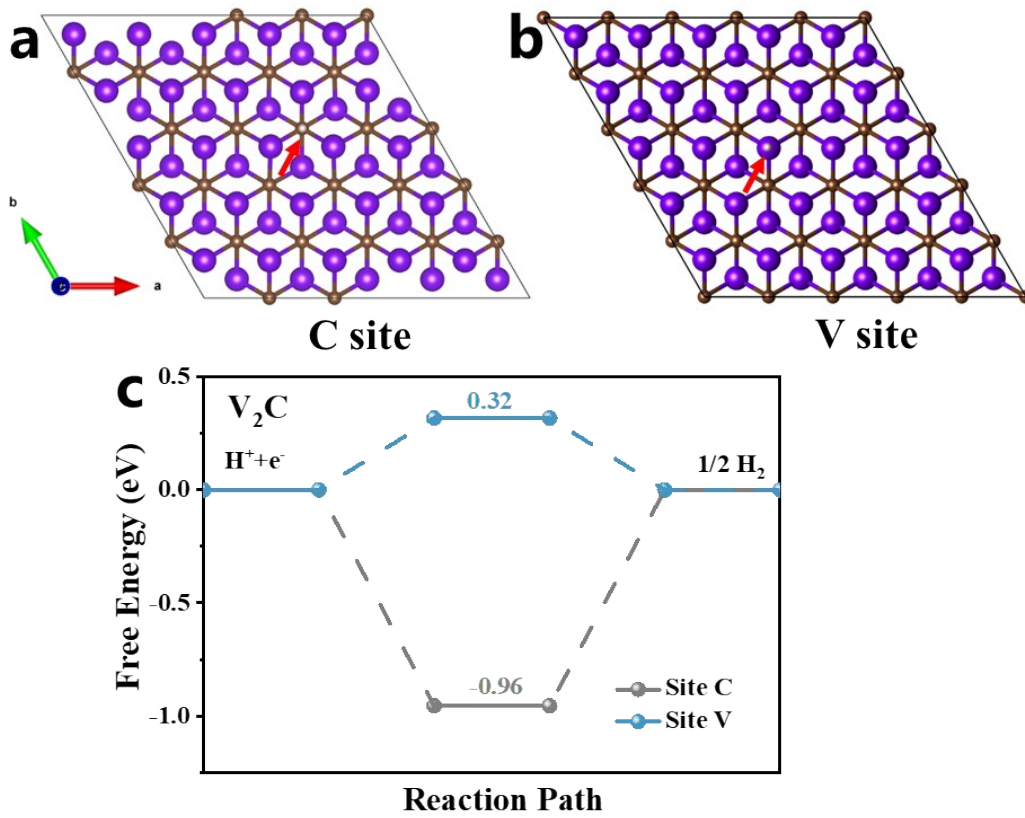

145

146 **Figure S4.** (a-b) Optimized structures and (c) Gibbs free energy changes of H\* intermediates in C and V  
147 sites for V<sub>2</sub>C.

148

149

150

151

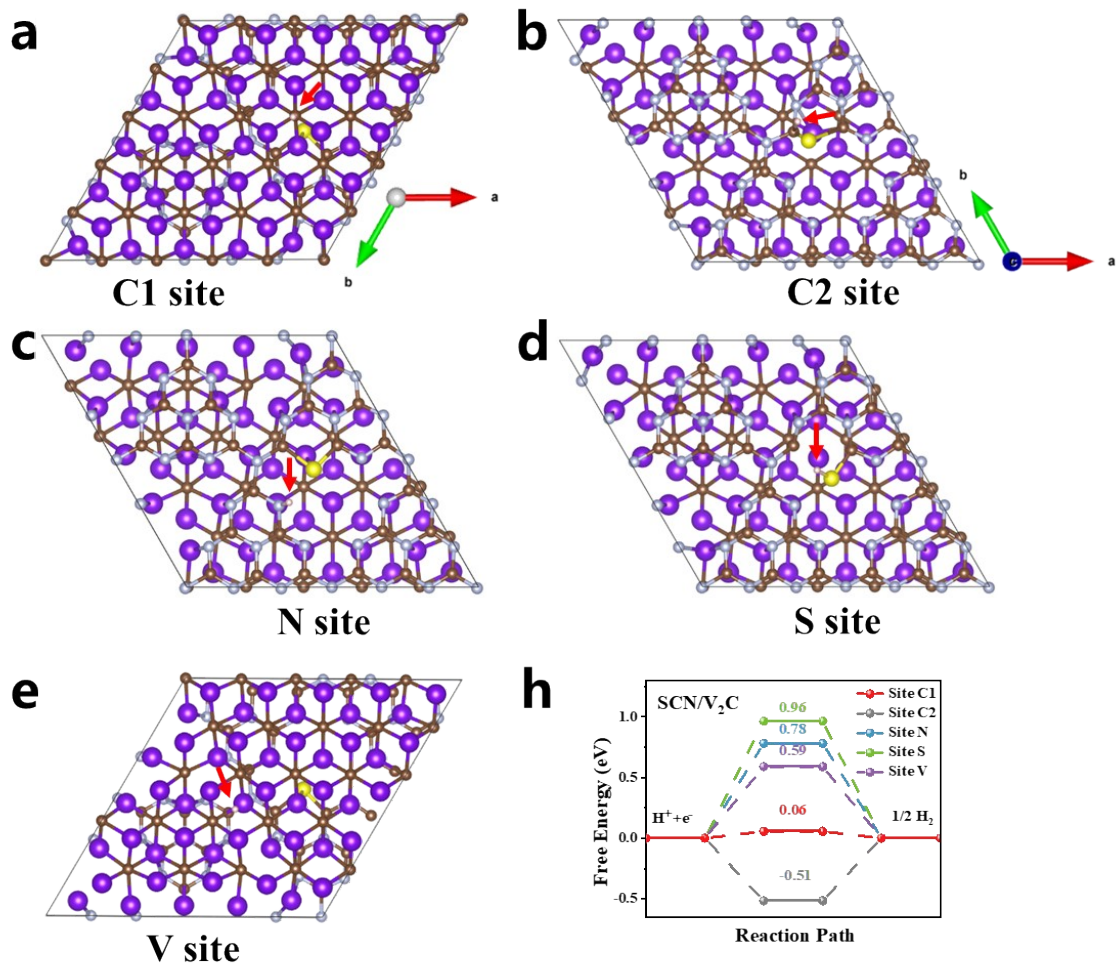

152

153 **Figure S5.** (a-e) Optimized structures and (h) Gibbs free energy changes of H\* intermediates in C1, C2, N,  
154 S, and V sites for SCN/V<sub>2</sub>C heterojunction.

155

156

157

158

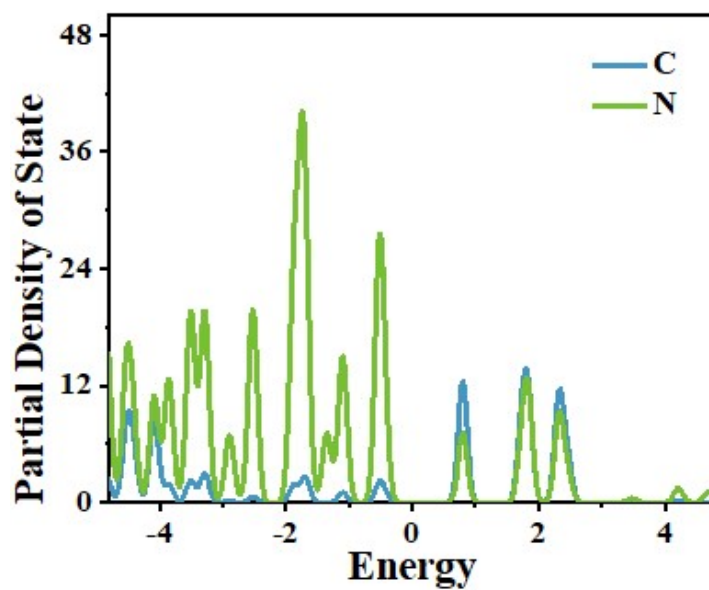

159

160

161

Figure S6. Partial density of states for CN.

162

163

164

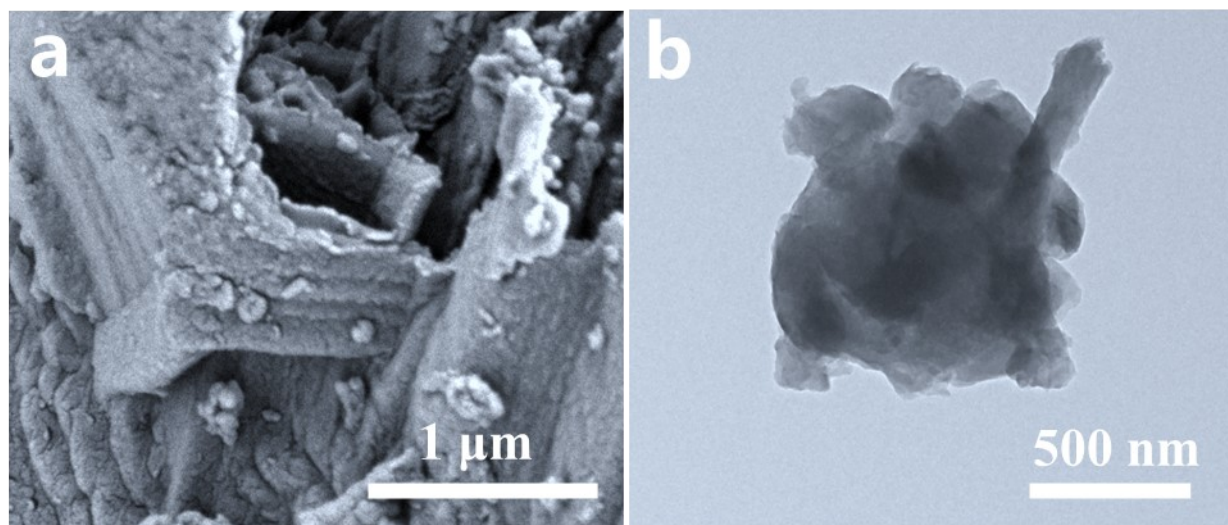

165

166

**Figure S7.** (a-b) SEM and TEM images of CN.

167

168

169

170

171

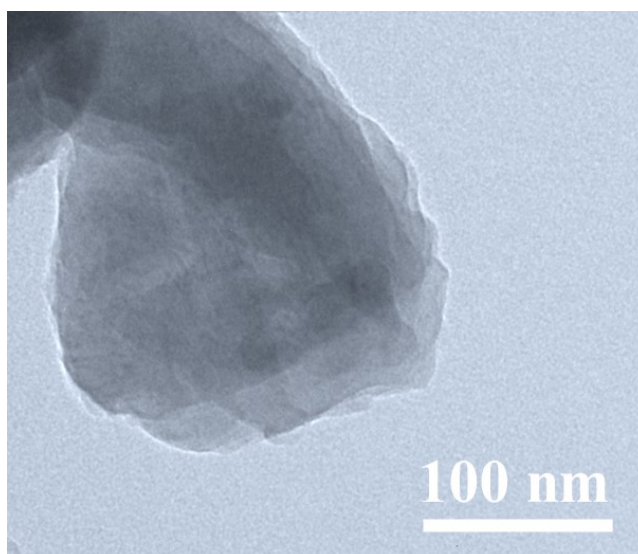

172

173

174

**Figure S8.** (a-b) TEM images of SCN.

175

176

177

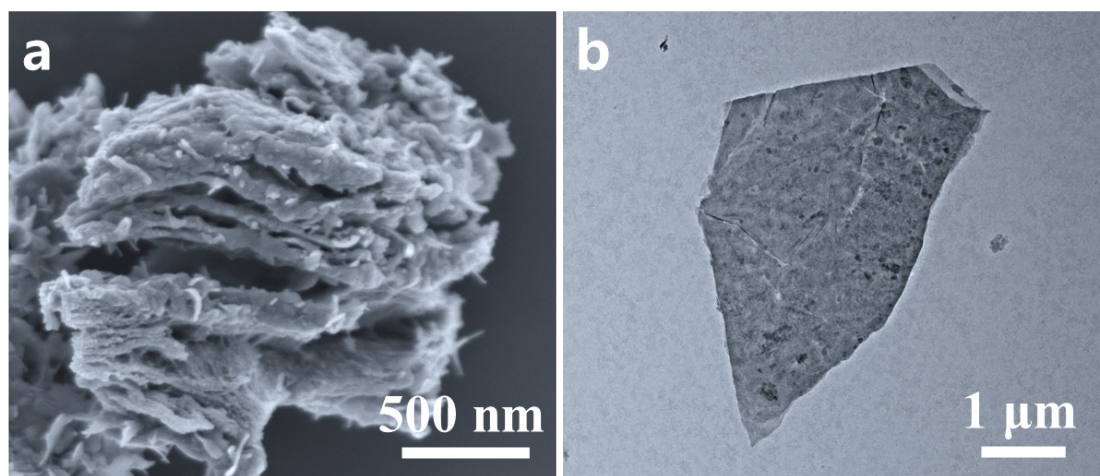

178

179

180

**Figure S9.** (a-b) SEM and TEM images of  $V_2C$ .



181

182

183

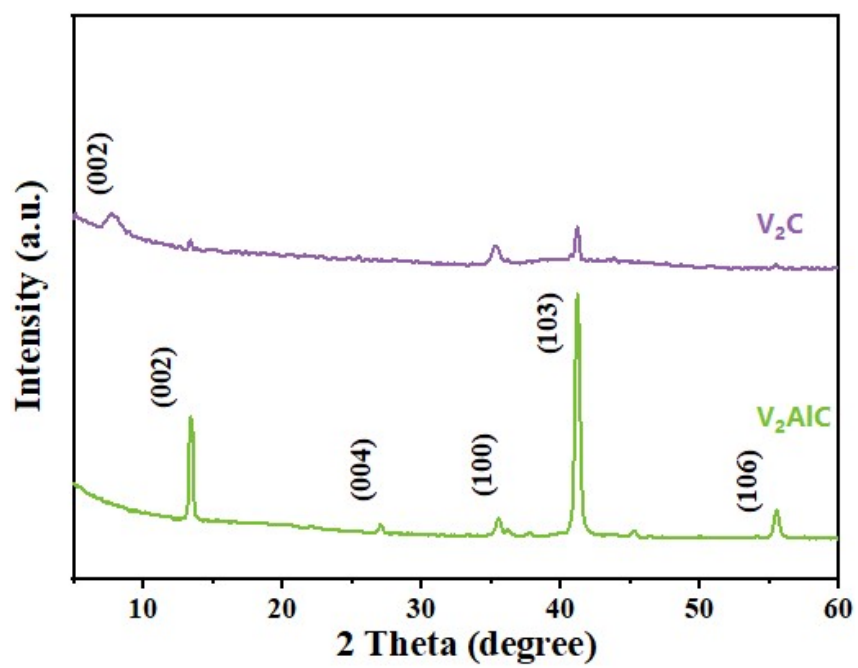

184

185

186

Figure S10. XRD patterns of  $V_2C$ ,  $V_2AlC$ .

187

188

189

190

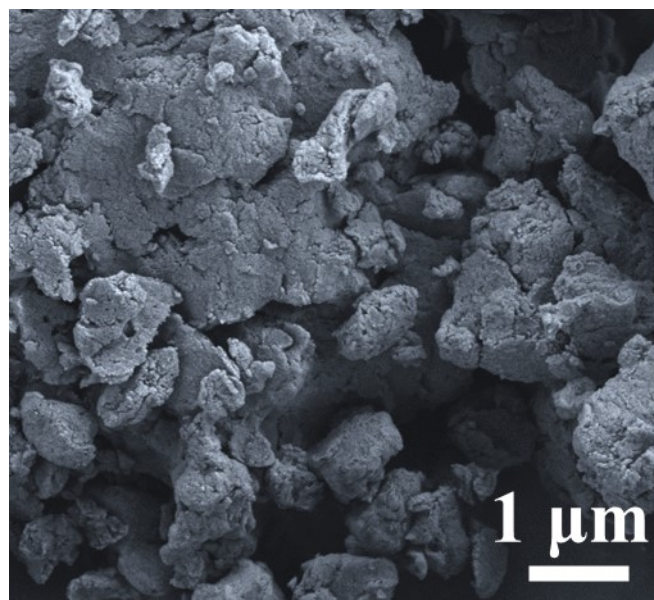

191

192

193

**Figure S11.** SEM images of SCN/V<sub>2</sub>C heterojunction.

194

195

196

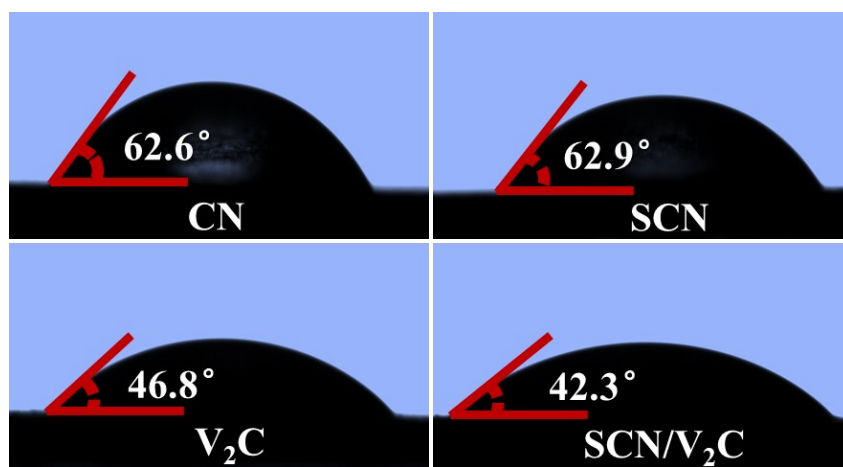

197

198

199

**Figure S 12.** The contact Angle of CN, SCN, V<sub>2</sub>C, SCN/V<sub>2</sub>C.

200  
201  
202

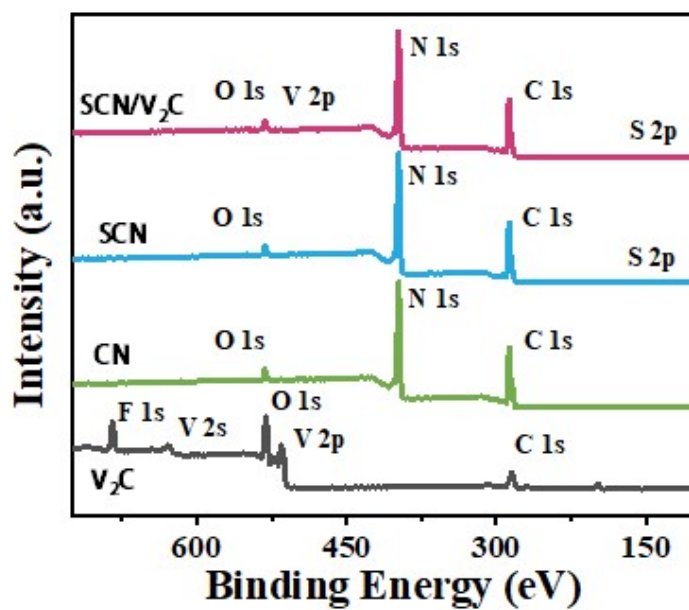

203  
204  
205

**Figure S13.** The high-resolution XPS survey spectra of V<sub>2</sub>C, CN, SCN, SCN/V<sub>2</sub>C.

206

207

208

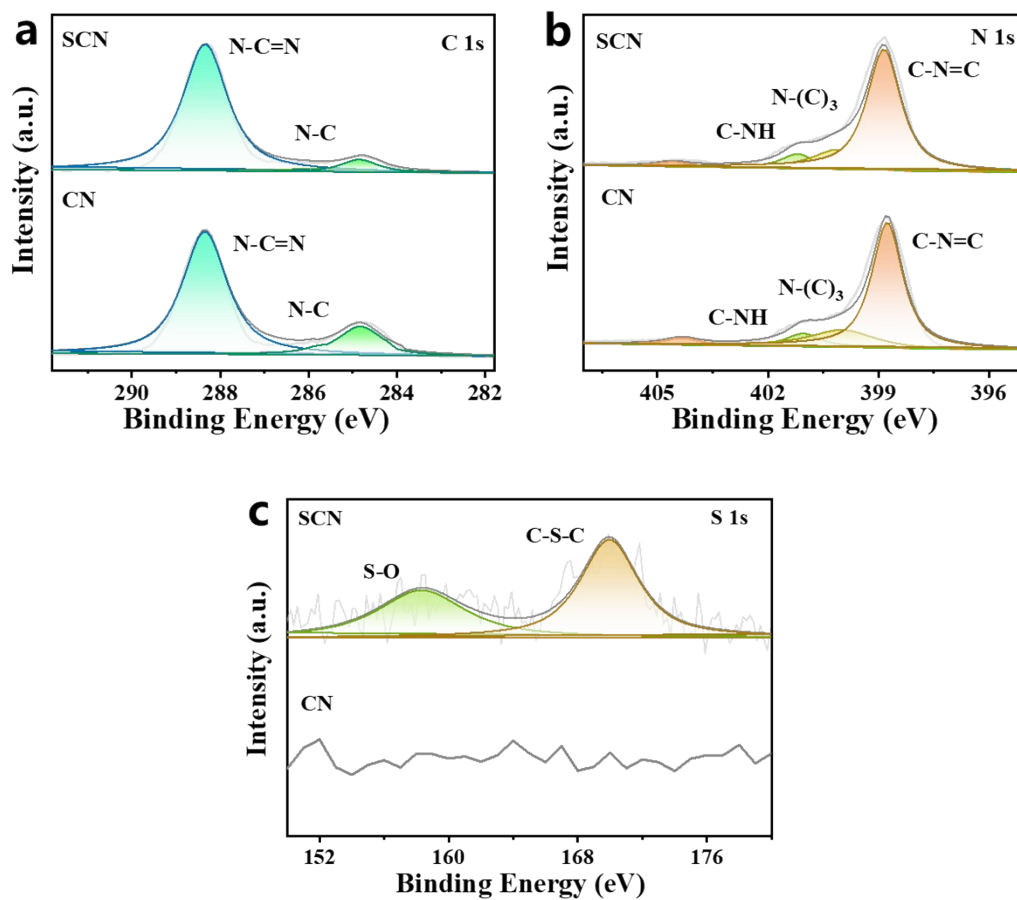

209

210

211

**Figure S14.** (a-c) The high-resolution XPS spectra of C 1s, N 1s, and S 1s of CN.

212

213

214

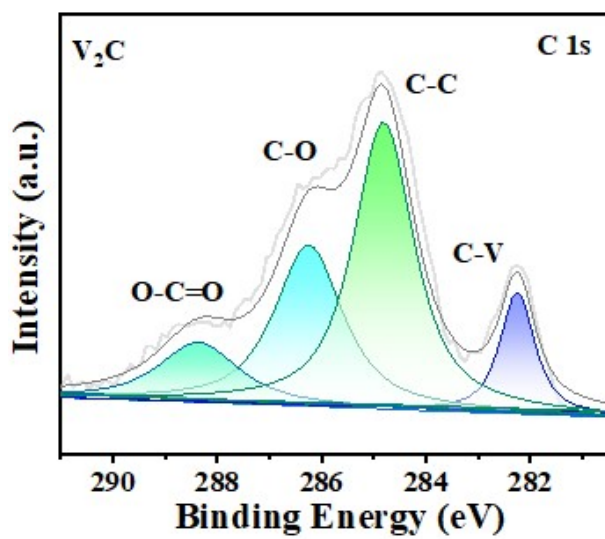

215

216

217

**Figure S15.** The high-resolution XPS spectra of C 1s of V<sub>2</sub>C.

218  
219  
220

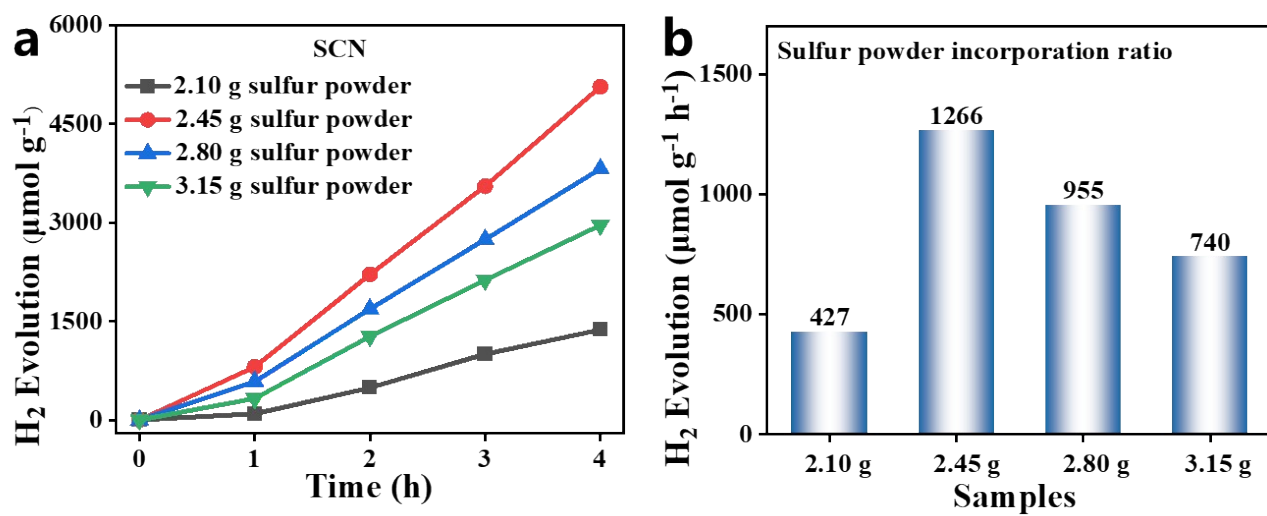

221

222 **Figure S16.** (a-b) Photocatalytic H<sub>2</sub> evolution activities of SCN obtained at different sulfur powder contents.

223  
224

225

226

227

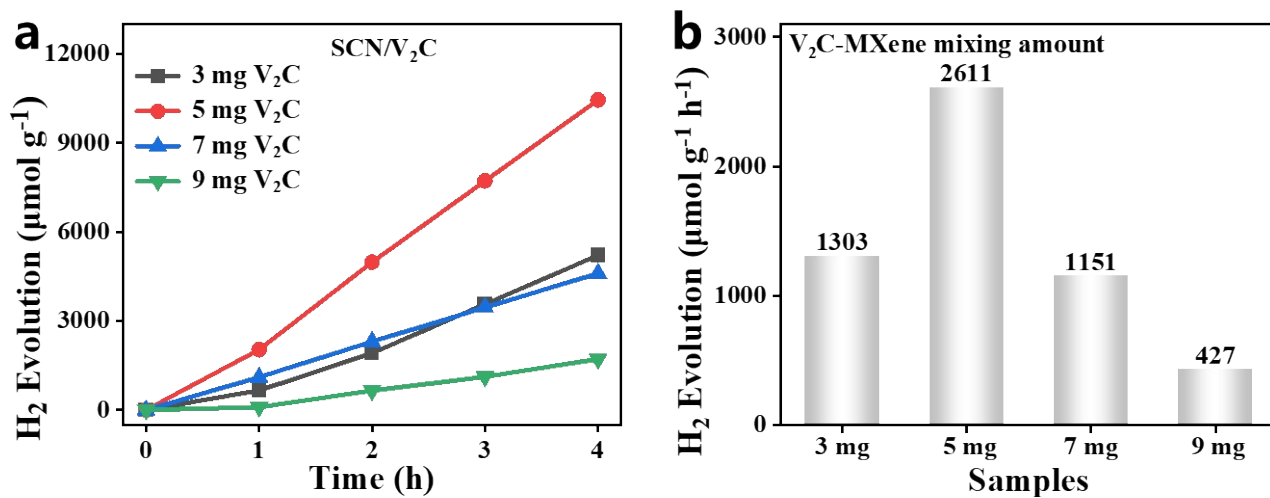

228

229

230

231

**Figure S17.** (a-b) Photocatalytic H<sub>2</sub> evolution activities of SCN/V<sub>2</sub>C obtained at different V<sub>2</sub>C MXene contents.



232

233

234

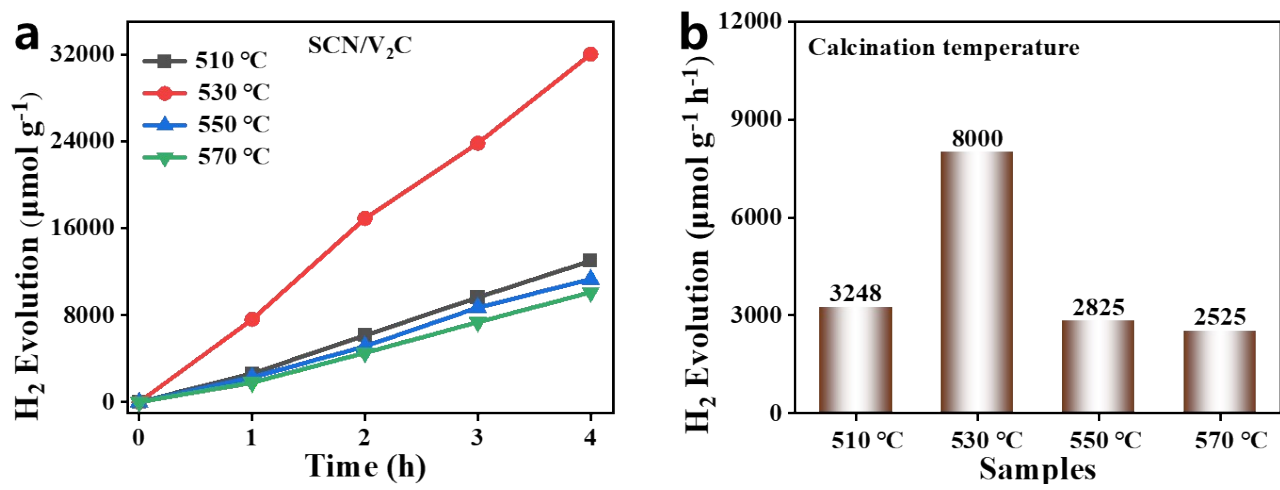

235

236

237

238

Figure S18. (a-b) Photocatalytic H<sub>2</sub> evolution activities of SCN/V<sub>2</sub>C were obtained at different calcination temperatures.

239

240

241

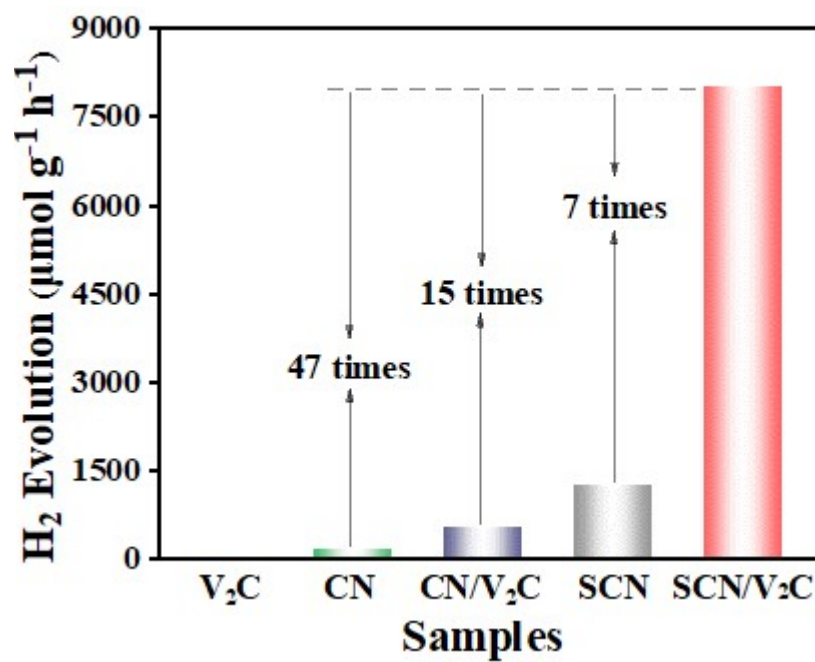

242

243

244

245

**Figure S19.** The enhanced photocatalytic H<sub>2</sub> production rate of SCN/V<sub>2</sub>C was compared with V<sub>2</sub>C, CN, SCN, and CN/V<sub>2</sub>C.

246  
247

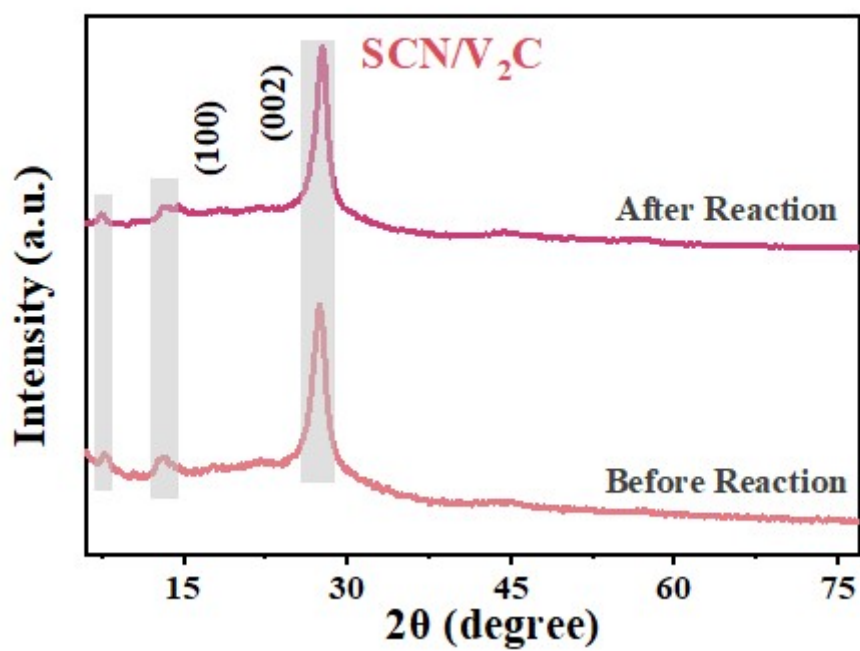

248  
249  
250

**Figure S20.** XRD patterns of SCN/V<sub>2</sub>C before and after cycle reaction.

251

252

253

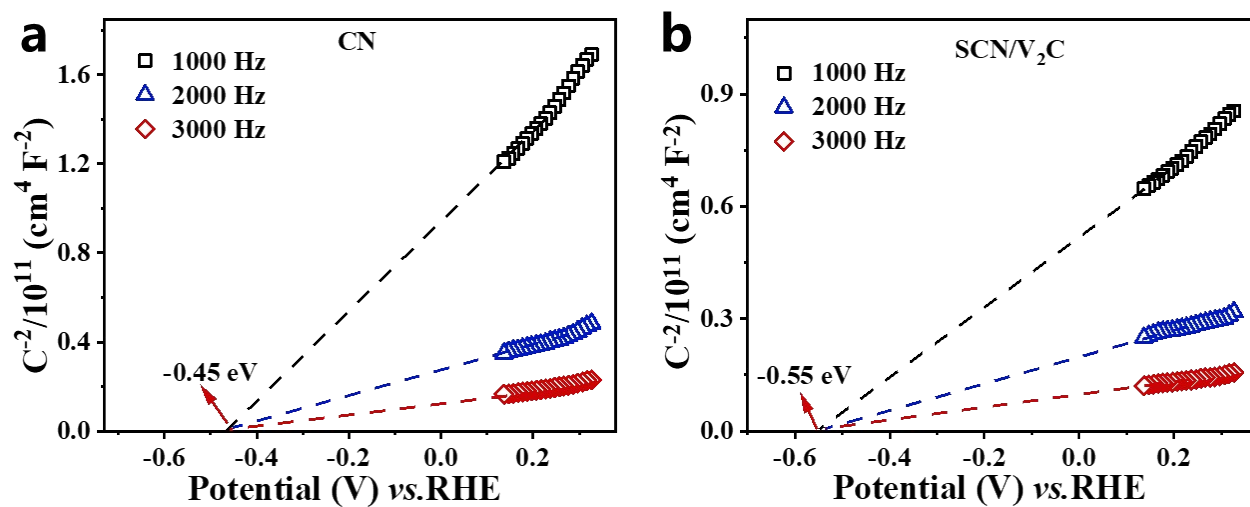

254

255

Figure S21. (a-b) M-S plots of CN, SCN/V<sub>2</sub>C at different frequencies.

256

The slope of the M-S curve is positive, indicating that the material is an n-type semiconductor, and the

257  $E_{CB}$  of the n-type semiconductor is more negative than the corresponding  $E_{fb}$  (flat band potential) (about 0.3

258 V).

259

$$E_{CB} \text{ (RHE)} = E_{fb} - 0.3$$

260

$$E_{CB} \text{ (vacuum level)} = E_{CB} \text{ (RHE)} - 4.5$$

261

In addition, the corresponding  $E_{VB}$  values can be obtained according to  $E_g$  and conduction band

262 potential ( $E_{CB}$ ) values.

263

$$E_{CB} \text{ (RHE)} = E_{VB} \text{ (RHE)} - E_g$$

264

265

266

267

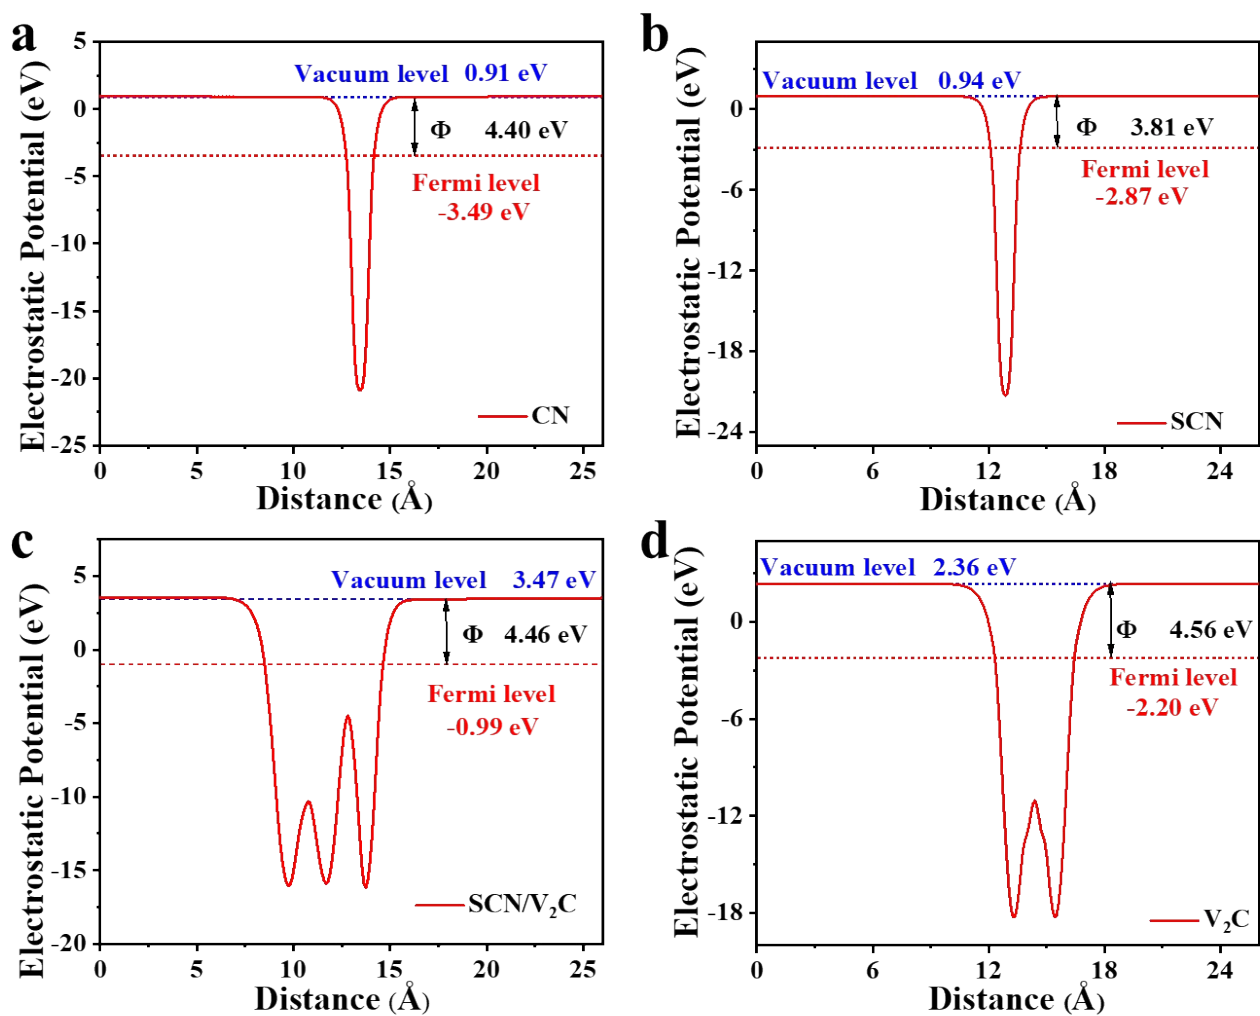

268

269 **Figure S22.** The calculated work functions of (a) CN, (b) SCN, (c)  $V_2C$  and (d) SCN/ $V_2C$  heterojunction.

270

271 The electron work function ( $\Phi$ ) is defined as the difference between the vacuum energy level ( $E_V$ ) and

272 the Fermi energy level ( $E_F$ ).  $\Phi = E_V - E_F$

273

274

275

276

277

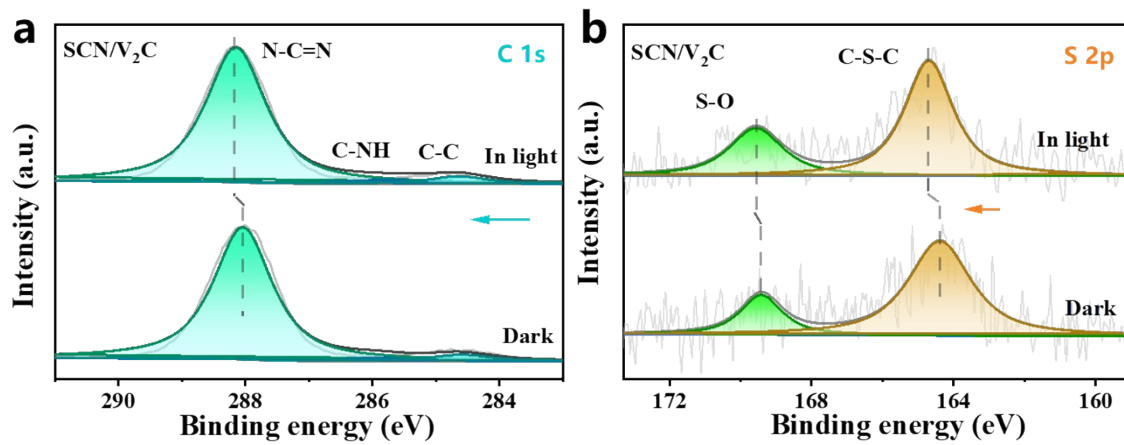

278

279

280

**Figure S23.** *In situ* irradiated spectra of (a) C 1s and (b) S 2p for SCN/V<sub>2</sub>C heterojunction.

281

282

283

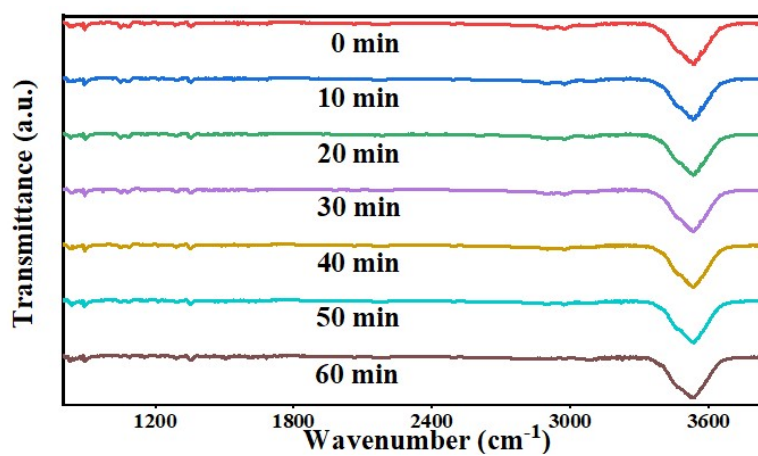

284

285

286

**Figure S24.** *In situ* Fourier infrared spectra of SCN/V<sub>2</sub>C heterojunction.

287

288

289

290 **Table S1** elements contents of V<sub>2</sub>C, CN, SCN, SCN/V<sub>2</sub>C heterojunction derived from XPS (at %).

| Sample               | C (at %) | N (at %) | S (at %) | V (at %) |
|----------------------|----------|----------|----------|----------|
| V <sub>2</sub> C     | 70.24    | /        | /        | 29.76    |
| CN                   | 47.56    | 52.44    | /        | /        |
| SCN                  | 44.35    | 55.35    | 0.3      | /        |
| SCN/V <sub>2</sub> C | 43.83    | 55.51    | 0.28     | 0.38     |

291

292



293

294

295

296

**Table S2** The XPS results of C 1s and V 2p for V<sub>2</sub>C.

| Peak | Binding energy<br>(eV) | Assignment      | FWHM<br>(eV) | Peak area |
|------|------------------------|-----------------|--------------|-----------|
| C 1s | 288.3                  | O-C=O           | 1.8          | 4716.10   |
|      | 286.2                  | C-O             | 1.6          | 10822.17  |
|      | 282.2                  | C-V             | 0.8          | 4173.22   |
| V 2p | 524.5                  | V <sup>4+</sup> | 2            | 1693.67   |
|      | 522.7                  | V <sup>3+</sup> | 1.8          | 458.70    |
|      | 521.5                  | V <sup>2+</sup> | 1.9          | 893.57    |
|      | 517.1                  | V <sup>4+</sup> | 1.9          | 2343.71   |
|      | 515.5                  | V <sup>3+</sup> | 1.6          | 234.51    |
|      | 514.1                  | V <sup>2+</sup> | 1.5          | 488.67    |

297

298

299

300

301

302

**Table S3** The XPS results of C 1s and N 1s for CN.

| Peak | Binding energy<br>(eV) | Assignment         | FWHM<br>(eV) | Peak area |
|------|------------------------|--------------------|--------------|-----------|
| C 1s | 288.3                  | N-C=N              | 1.2          | 94733.39  |
|      | 286.6                  | C-N                | 2            | 3974.90   |
| N 1s | 401.1                  | C-NH               | 1.1          | 13134.88  |
|      | 400.1                  | N-(C) <sub>3</sub> | 2            | 35082.46  |
|      | 398.9                  | C-N=C              | 1.1          | 134716.7  |

303

304

305

306

307

308

**Table S4** The XPS results of C 1s, N 1s, and S 2p for SCN.

| Peak | Binding energy<br>(eV) | Assignment         | FWHM<br>(eV) | Peak area |
|------|------------------------|--------------------|--------------|-----------|
| C 1s | 288.3                  | N-C=N              | 1.2          | 97508.77  |
|      | 286.3                  | N-C                | 2            | 4573.74   |
| N 1s | 401.0                  | C-NH               | 1.5          | 14295.44  |
|      | 400.0                  | N-(C) <sub>3</sub> | 1.6          | 29407.77  |
|      | 398.6                  | C-N=C              | 1.2          | 142522.3  |
| S 2p | 170.1                  | S-O                | 2            | 135.49    |
|      | 164.7                  | C-S-C              | 2.5          | 913.07    |

309

310

311

312

313

314

**Table S5** The XPS results of C 1s, N 1s, S 2p, and V 2p for SCN/V<sub>2</sub>C heterojunction.

| Peak | Binding energy (eV) | Assignment         | FWHM (eV) | Peak area |
|------|---------------------|--------------------|-----------|-----------|
| C 1s | 288.5               | N-C=N              | 1.3       | 95194.59  |
|      | 286.7               | N-C                | 1.5       | 3041.72   |
| N 1s | 401.1               | C-NH               | 1.0       | 20603.64  |
|      | 400.1               | N-(C) <sub>3</sub> | 1.5       | 27735.66  |
| S 2p | 398.8               | C-N=C              | 1.1       | 150501    |
|      | 170.3               | S-O                | 3         | 557.03    |
| V 2p | 165.1               | C-S-C              | 2         | 768.84    |
|      | 524.3               | V <sup>4+</sup>    | 2.14      | 16479.81  |
|      | 522.4               | V <sup>3+</sup>    | 1.54      | 7118.41   |
|      | 520.6               | V <sup>2+</sup>    | 1.14      | 8283.49   |
|      | 516.4               | V <sup>4+</sup>    | 2         | 50331.63  |
|      | 514.4               | V <sup>3+</sup>    | 2         | 19389.83  |
|      | 513.7               | V <sup>2+</sup>    | 1.5       | 27933.22  |

315

316

317 **Table S6** Photocatalytic H<sub>2</sub> precipitation activity and comparison of catalyst variables.

| <b>Catalyst</b>           | <b>catalyst quantity<br/>(mg)</b> | <b>Light Source</b> | <b>Reaction<br/>condition</b>         | <b>Co-catalyst</b> | <b>H<sub>2</sub><br/>(<math>\mu\text{mol g}^{-1} \text{h}^{-1}</math>)</b> |
|---------------------------|-----------------------------------|---------------------|---------------------------------------|--------------------|----------------------------------------------------------------------------|
| <b>SCN/V<sub>2</sub>C</b> | <b>20</b>                         | <b>300 W Xemon</b>  | <b>Water (90 mL)<br/>TEOA (10 mL)</b> | <b>Pt (3 wt.%)</b> | <b>8003</b>                                                                |
| <b>V<sub>2</sub>C</b>     | <b>20</b>                         | <b>300 W Xemon</b>  | <b>Water (90 mL)<br/>TEOA (10 mL)</b> | <b>Pt (3 wt.%)</b> | <b>4</b>                                                                   |
| <b>CN</b>                 | <b>20</b>                         | <b>300 W Xemon</b>  | <b>Water (90 mL)<br/>TEOA (10 mL)</b> | <b>Pt (3 wt.%)</b> | <b>175</b>                                                                 |
| <b>CN/V<sub>2</sub>C</b>  | <b>20</b>                         | <b>300 W Xemon</b>  | <b>Water (90 mL)<br/>TEOA (10 mL)</b> | <b>Pt (3 wt.%)</b> | <b>539</b>                                                                 |
| <b>SCN</b>                | <b>20</b>                         | <b>300 W Xemon</b>  | <b>Water (90 mL)<br/>TEOA (10 mL)</b> | <b>Pt (3 wt.%)</b> | <b>1266</b>                                                                |

318

319

321 **Table S7** The comparisons of photocatalytic H<sub>2</sub> evolution activities between SCN/V<sub>2</sub>C heterojunction and  
 322 other MXenes or g-C<sub>3</sub>N<sub>4</sub> based photocatalysts previously reported.

323

324

| Catalyst                                                                                          | Light Source | Reaction condition             | Co-catalyst | H <sub>2</sub><br>( $\mu\text{mol g}^{-1}\text{h}^{-1}$ ) | Ref.         |
|---------------------------------------------------------------------------------------------------|--------------|--------------------------------|-------------|-----------------------------------------------------------|--------------|
| SCN/V <sub>2</sub> C                                                                              | 300 W Xemon  | Water (90 mL)<br>TEOA (10 mL)  | Pt (3 wt.%) | 8003                                                      | This<br>work |
| g-C <sub>3</sub> N <sub>4</sub> /WO <sub>3</sub>                                                  | 350 W Xemon  | Water (85 mL)<br>TEOA (15 mL)  | Pt (3 wt.%) | 482                                                       | 1            |
| ZnIn <sub>2</sub> S <sub>4</sub> /Ti <sub>3</sub> C <sub>2</sub> T <sub>x</sub>                   | 300 W Xemon  | Water (90 mL)<br>TEOA (10 mL)  | Pt (3 wt.%) | 3475                                                      | 2            |
| ZnIn <sub>2</sub> S <sub>4</sub> /g-C <sub>3</sub> N <sub>4</sub> /Ti <sub>3</sub> C <sub>2</sub> | 300 W Xemon  | Water (72 mL)<br>TEOA (8 mL)   | Pt (3 wt.%) | 2452                                                      | 3            |
| PCN/Ti <sub>3</sub> C <sub>2</sub>                                                                | 300 W Xemon  | Water (45 mL)<br>TEOA (5 mL)   | Pt (3 wt.%) | 2181                                                      | 4            |
| PTCN/Ti <sub>3</sub> C <sub>2</sub>                                                               | 300 W Xemon  | Water (80 mL)<br>MeOH (20 mL)  | Pt (2 wt.%) | 565                                                       | 5            |
| g-C <sub>3</sub> N <sub>4</sub> /V <sub>2</sub> C                                                 | 35 W Xemon   | Water (95 mL)<br>MeOH (5 mL)   | Pt (3 wt.%) | 360                                                       | 6            |
| Nb <sub>2</sub> O <sub>5</sub> /g-C <sub>3</sub> N <sub>4</sub>                                   | 300 W Xemon  | Water (72 mL)<br>TEOA (8 mL)   | Pt (3 wt.%) | 6770                                                      | 7            |
| s-g-C <sub>3</sub> N <sub>4</sub> /g-C <sub>3</sub> N <sub>4</sub>                                | 300 W Xemon  | Water (90 mL)<br>TEOA (10 mL)  | Pt (3 wt.%) | 5548                                                      | 8            |
| Cu/TiO <sub>2</sub> @Ti <sub>3</sub> C <sub>2</sub> T <sub>x</sub>                                | 300 W Xemon  | Water (140 mL)<br>MeOH (10 mL) | ---         | 860                                                       | 9            |
| Na-g-C <sub>3</sub> N <sub>4</sub>                                                                | 300 W Xemon  | Water (90 mL)<br>TEOA (10 mL)  | Pt (3 wt.%) | 143                                                       | 10           |
| MnCo <sub>2</sub> S <sub>4</sub> /g-C <sub>3</sub> N <sub>4</sub>                                 | 300 W Xemon  | Water (80 mL)<br>TEOA (20 mL)  | Pt (3 wt.%) | 2979                                                      | 11           |

325

326

327

328

**Table S8** Calculated PL decay lifetimes from a two-exponential model.

| Samples              | $\tau_1$ (ns) | $\tau_2$ (ns) | $\tau_{\text{Avg}}$ (ns) |
|----------------------|---------------|---------------|--------------------------|
| CN                   | 2.12          | 10.90         | 2.32                     |
| SCN                  | 1.47          | 8.35          | 1.611                    |
| SCN/V <sub>2</sub> C | 1.29          | 7.37          | 1.334                    |

329

330

331

332

333

334

**Table S9** The fitted time constant from the TAS decay for the samples.

| Samples | $\tau_1$ (ps) | $\tau_2$ (ps) |
|---------|---------------|---------------|
| CN      | 13.30±1.31    | 456.65±31.87  |
| SCN     | 6.20±1.25     | 672.73±119.56 |
| SCNV    | 10.38±0.26    | 894.97±11.45  |

335

336



## 337 References

- 338 [1] Abdul N, Munir A, Ahmad N, et al. Photocatalytic Z-scheme overall water splitting: recent advances in  
339 theory and experiments. *Advanced Materials*, 2021, 33(52): 2105195.
- 340 [2] Zuo G, Wang Y, Teo W, et al. Ultrathin ZnIn<sub>2</sub>S<sub>4</sub> nanosheets anchored on Ti<sub>3</sub>C<sub>2</sub>T<sub>x</sub> MXene for  
341 photocatalytic H<sub>2</sub> evolution. *Angewandte Chemie*, 2020, 132(28): 11383-11388.
- 342 [3] Wang L, Yang T, Peng L, et al. Dual transfer channels of photo-carriers in 2D/2D/2D sandwich-like  
343 ZnIn<sub>2</sub>S<sub>4</sub>/g-C<sub>3</sub>N<sub>4</sub>/Ti<sub>3</sub>C<sub>2</sub> MXene S-scheme/Schottky heterojunction for boosting photocatalytic H<sub>2</sub> evolution.  
344 *Chinese Journal of Catalysis*, 2022, 43(10): 2720-2731.
- 345 [4] Xu H, Xia R, Huang J, et al. In situ construction of protonated g-C<sub>3</sub>N<sub>4</sub>/Ti<sub>3</sub>C<sub>2</sub> MXene Schottky  
346 heterojunctions for efficient photocatalytic hydrogen production. *Chinese Journal of Catalysis*, 2021, 42(1):  
347 107-114.
- 348 [5] Huang K, Li C, Zhang X, et al. Self-assembly synthesis of phosphorus-doped tubular g-C<sub>3</sub>N<sub>4</sub>/Ti<sub>3</sub>C<sub>2</sub> MXene  
349 Schottky junction for boosting photocatalytic hydrogen evolution. *Green Energy & Environment*, 2023, 8(1):  
350 233-245.
- 351 [6] Sherryana A, Tahir M, Zakaria Z. Well-structured V<sub>2</sub>C MXenes coupled g-C<sub>3</sub>N<sub>4</sub> 2D/2D nanohybrids for  
352 proficient charge separation with the role of triethanolamine (TEOA) as a protective barrier of g-C<sub>3</sub>N<sub>4</sub> for  
353 stimulating photocatalytic H<sub>2</sub> production. *International Journal of Hydrogen Energy*, 2024, 51: 1511-1531.
- 354 [7] Dong Q, Chen Z, Zhao B, et al. In situ fabrication of niobium pentoxide/graphitic carbon nitride type-II  
355 heterojunctions for enhanced photocatalytic hydrogen evolution reaction. *Journal of Colloid and Interface  
356 Science*, 2022, 608: 1951-1959.
- 357 [8] Jiang J, Xiong Z, Wang H, et al. Sulfur-doped g-C<sub>3</sub>N<sub>4</sub>/g-C<sub>3</sub>N<sub>4</sub> isotype step-scheme heterojunction for  
358 photocatalytic H<sub>2</sub> evolution. *Journal of Materials Science & Technology*, 2022, 118: 15-24.

- 359 [9] Peng C, Wei P, Li X, et al. High efficiency photocatalytic hydrogen production over ternary Cu/TiO<sub>2</sub>@  
360 Ti<sub>3</sub>C<sub>2</sub>T<sub>x</sub> enabled by low-work-function 2D titanium carbide. Nano Energy, 2018, 53: 97-107.
- 361 [10] Yi W, Du X, Zhang M, et al. Rational distribution of Ru nanodots on 2D Ti<sub>3-x</sub>C<sub>2</sub>T<sub>y</sub>/g-C<sub>3</sub>N<sub>4</sub>  
362 heterostructures for boosted photocatalytic H<sub>2</sub> evolution. Nano Research, 2023, 16(5): 6652-6660.
- 363 [11] Zhang L, Ding N, Hashimoto M, et al. Sodium-doped carbon nitride nanotubes for efficient visible  
364 light-driven hydrogen production. Nano Research, 2018, 11: 2295-2309.
